# Supplementary material
Source: PubMed Central journal article supplement (PMC3350128)
Supplement: 00159.2009_1.pdf [file 00159.2009_1.pdf]

**WNK4-SGK-S1169D**  
**Resembles hyperkalemia**

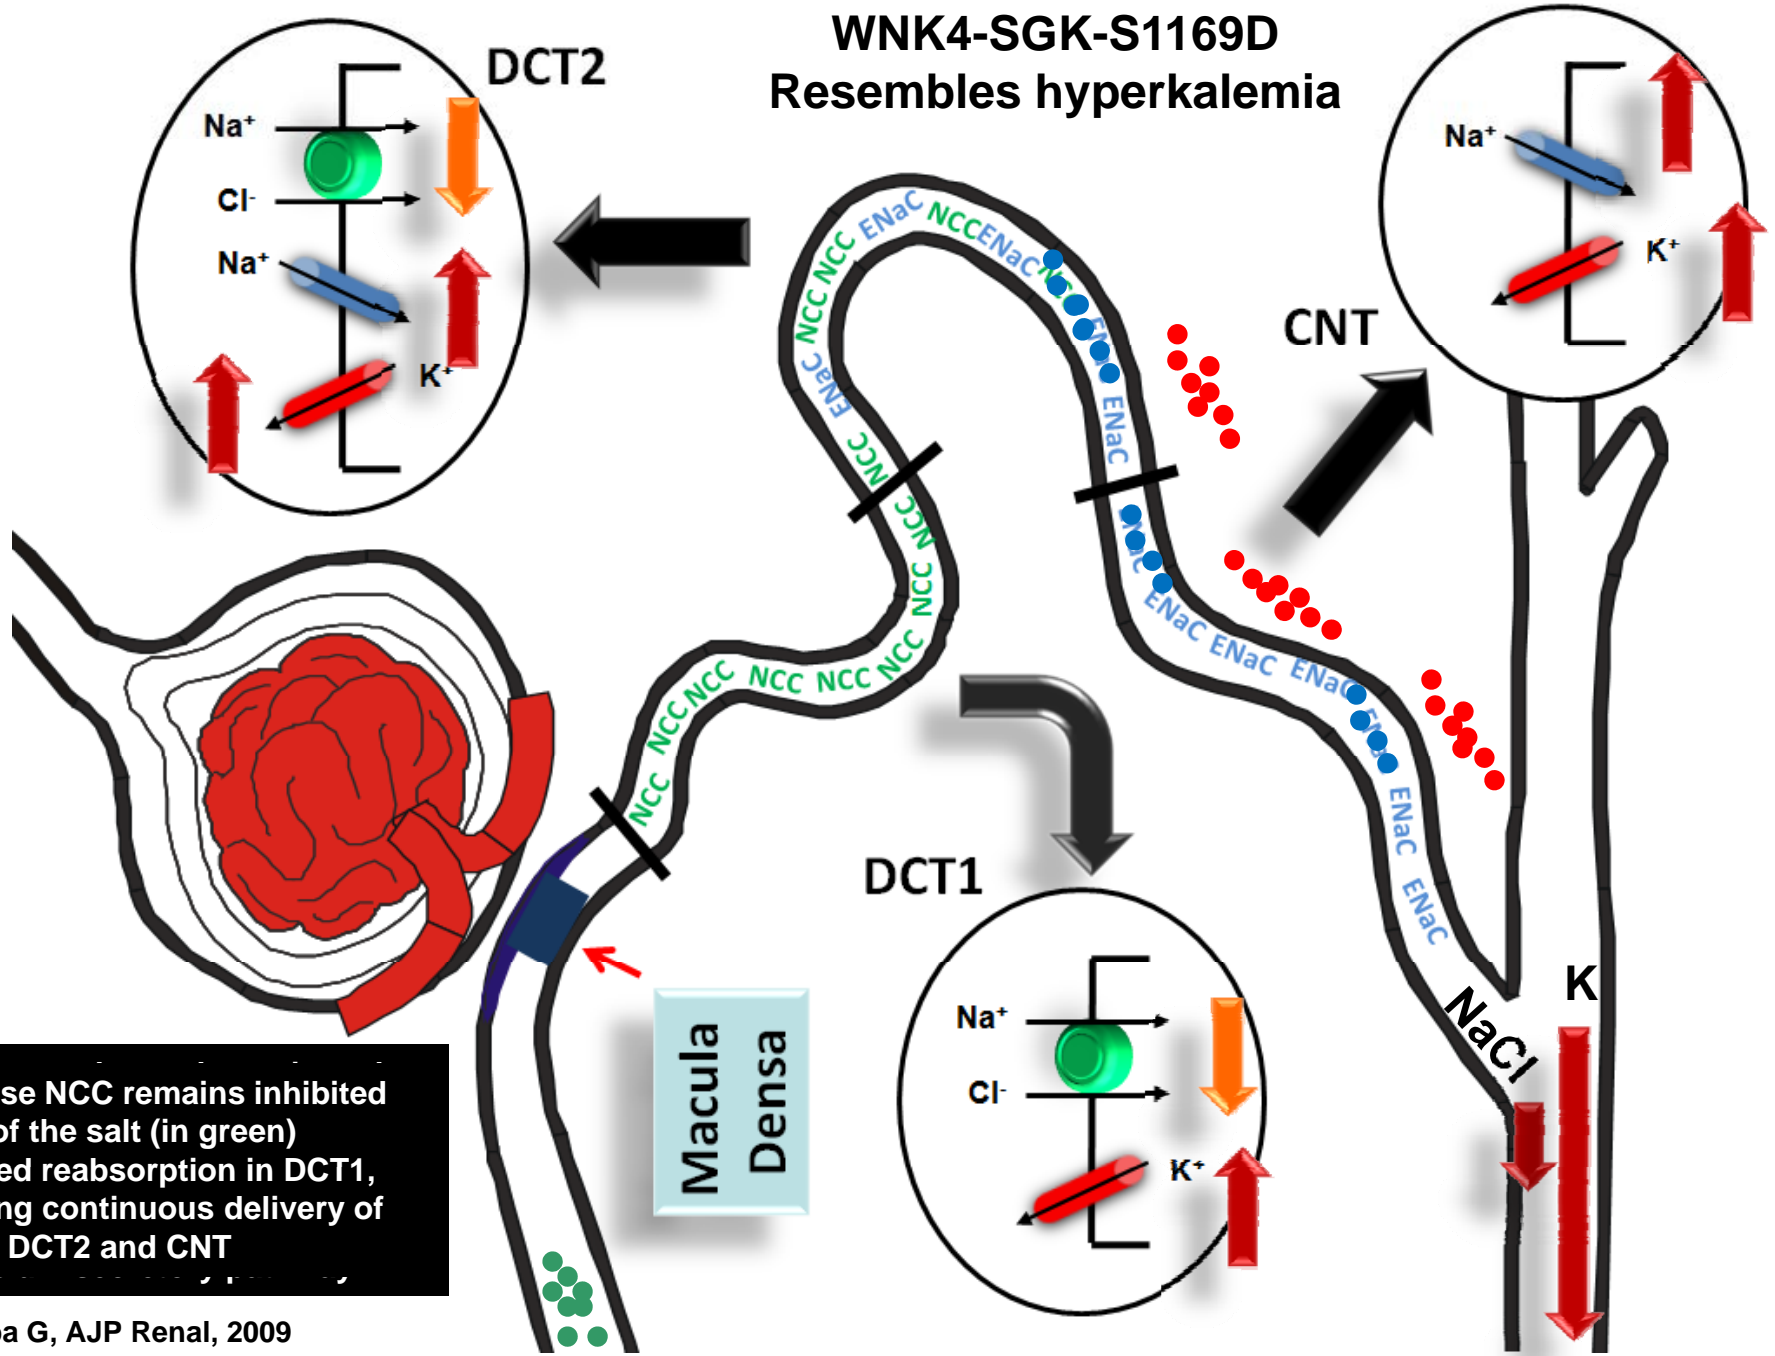

Because NCC remains inhibited most of the salt (in green) escaped reabsorption in DCT1, allowing continuous delivery of salt to DCT2 and CNT
