# Supplementary material
Source: PubMed Central journal article supplement (PMC3350128)
Supplement: 00159.2009_2.pdf [file 00159.2009_2.pdf]

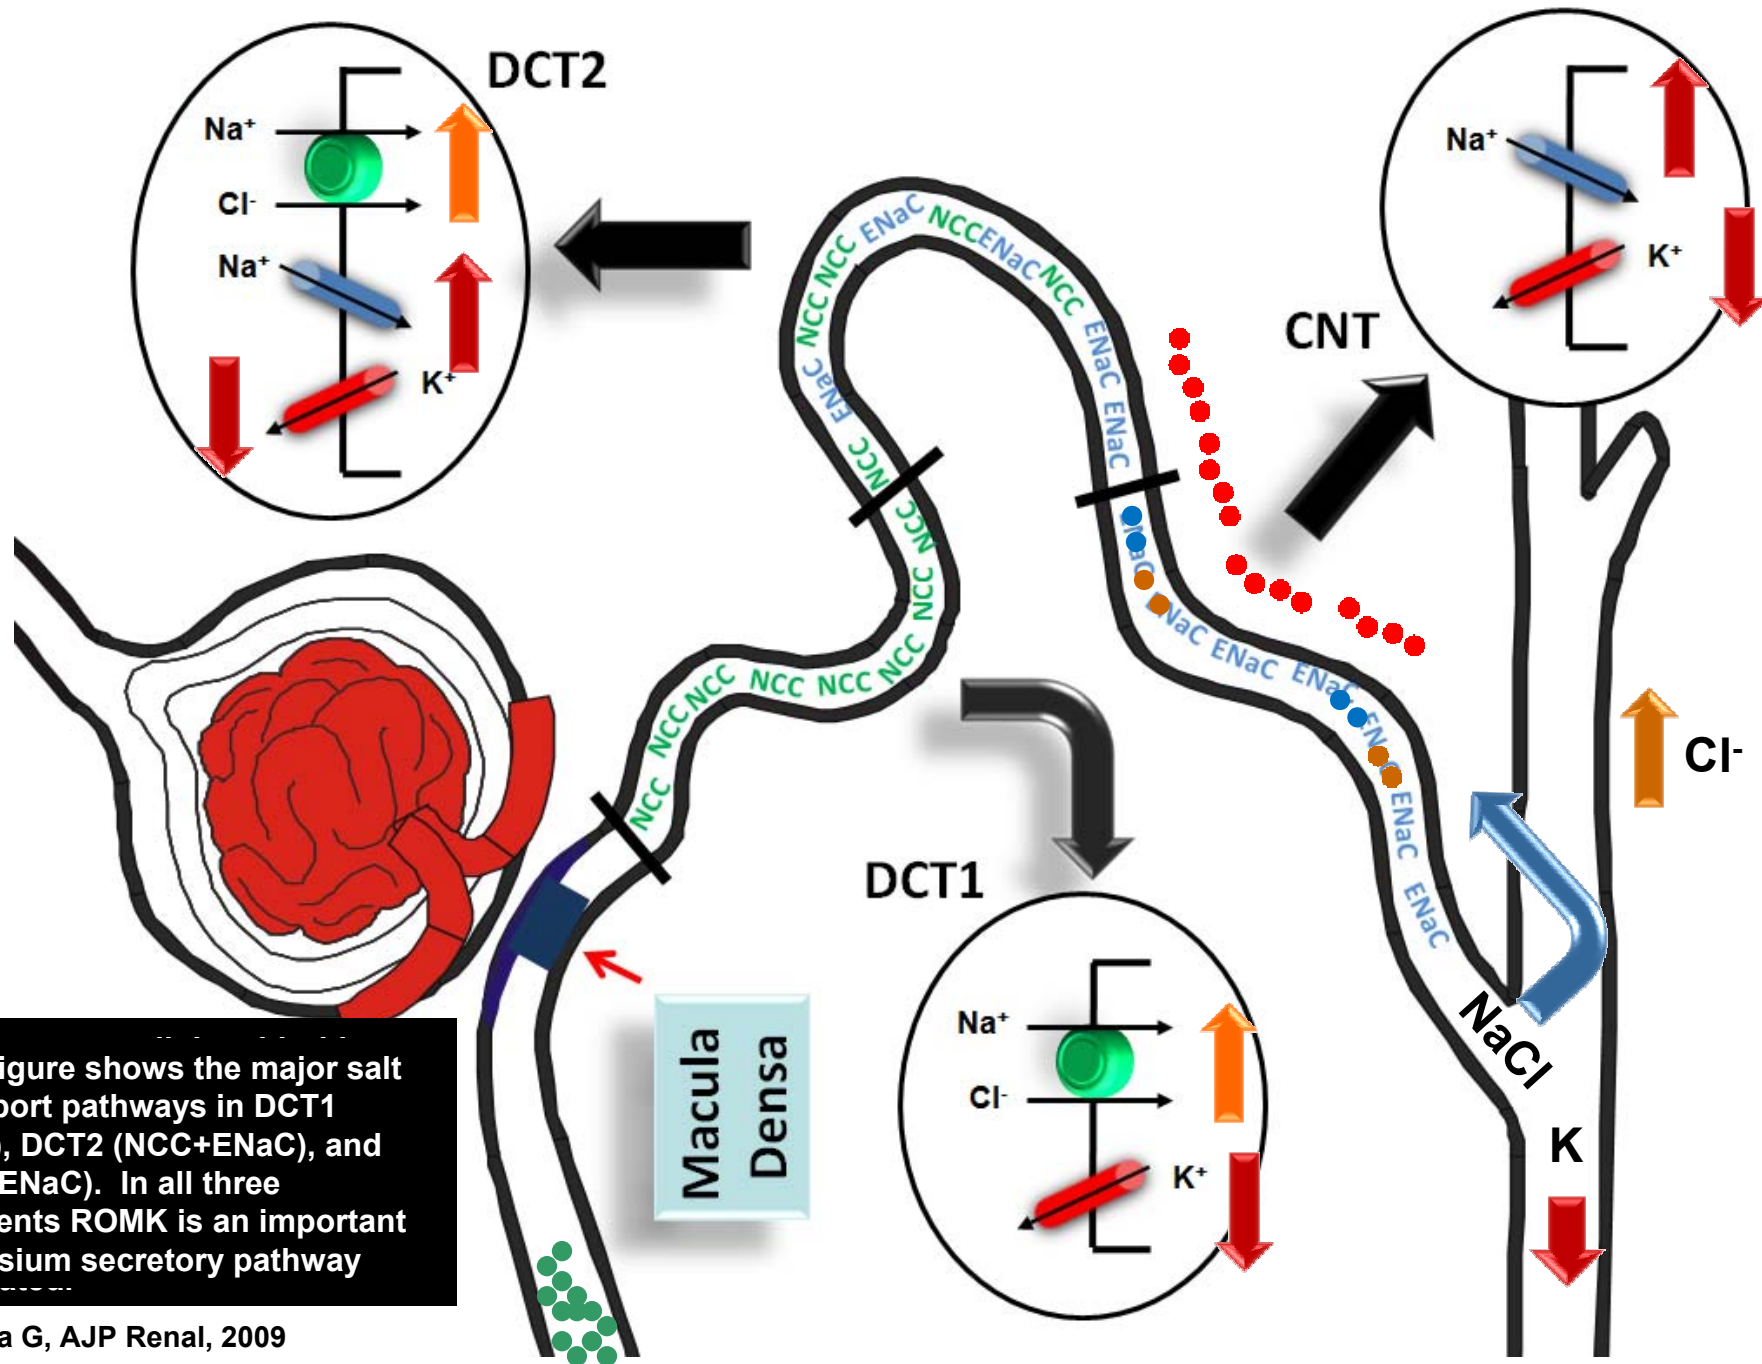

This figure shows the major salt transport pathways in DCT1 (NCC), DCT2 (NCC+ENaC), and CNT (ENaC). In all three segments ROMK is an important potassium secretory pathway
